# Supplementary material for: Patient-reported outcome survey of user-experiences in the spinal cord injured-community with MPPT for treating wounds and pressure injuries and for controlling soft tissue infection caused by osteomyelitis
Source: Frontiers journal article supplement (doi:10.3389/fresc.2024.1386518), 2024-06-20
Supplement: Data_Sheet_1.pdf [file Data_Sheet_1.pdf]

## Supplement 1: Wound products used prior to MPPT

Participants were asked “*Did you try any other treatments before using Amicapsil? (Yes/No)*”; followed by the open-ended question: “*What dressings, treatments did you try, and for how long?*”. The responses provided are given below.

|                                                                                                                                                                                                                    |
|--------------------------------------------------------------------------------------------------------------------------------------------------------------------------------------------------------------------|
| BED REST.....TALC                                                                                                                                                                                                  |
| I used Vashe wound wash, Medihoney wound gel, and hydrocolloid dressings.                                                                                                                                          |
| Medi honey/allevyn dressing                                                                                                                                                                                        |
| Old wound- inadine                                                                                                                                                                                                 |
| Allevyn. A vacuum dressing which I can't remember the name. Various other dressings.                                                                                                                               |
| kerralite cool, manuka honey & various others                                                                                                                                                                      |
| Flamminal. Two months                                                                                                                                                                                              |
| Aquacel + Allevyn for a month                                                                                                                                                                                      |
| Iodine, clinical plaster for 2 months                                                                                                                                                                              |
| Allevyn and Inadine applied by district nurses                                                                                                                                                                     |
| Honey                                                                                                                                                                                                              |
| Mepilex border and Alevyn AG at various stages after seeing GP and TVN for over 6 months.                                                                                                                          |
| Manuka honey, Omnímatrix cream and aquacel                                                                                                                                                                         |
| Medihoney + Mepilex dressing                                                                                                                                                                                       |
| Multiple types from District nurses                                                                                                                                                                                |
| Duoderm dressing, manuka honey, aquagel                                                                                                                                                                            |
| savlon                                                                                                                                                                                                             |
| Dakokote and honey med                                                                                                                                                                                             |
| Mepilex border and other dressings for two weeks                                                                                                                                                                   |
| Silver                                                                                                                                                                                                             |
| Pro shield and inadine                                                                                                                                                                                             |
| Pico, vac, honey, over 4 years                                                                                                                                                                                     |
| UrgoClean, UrgoStart, Aquacel ribbons, Protosan as a gel, and as a liquid, ribbons with silver, promogran                                                                                                          |
| Tried everything, 15 months under Salisbury TV then home to district nurse                                                                                                                                         |
| As recommended by District Nurse.                                                                                                                                                                                  |
| Tried all conventional treatments under care of Spinal Unit, District Nurses and lastly a Tissue Viability Nurse. I had trouble with intolerance for dressing adhesive. Have identified it as acrylate which is in |

|                                                                                                                                                                                                                                                                        |
|------------------------------------------------------------------------------------------------------------------------------------------------------------------------------------------------------------------------------------------------------------------------|
| most dressings. I would use a dressing for a few days and then have to stop to let the dermatitis clear up                                                                                                                                                             |
| Aquacel primary and Allevyn secondary                                                                                                                                                                                                                                  |
| spinal injury recommended a bandage which made it worse and infected                                                                                                                                                                                                   |
| Vac dressings                                                                                                                                                                                                                                                          |
| Zinc, Urgo Clean, seaweed                                                                                                                                                                                                                                              |
| I have used every dressing available from the NHS over the 12 years                                                                                                                                                                                                    |
| Packing the wound several times a week at local GP surgery, various dressings and Vac machines - over the course of a year and a half.                                                                                                                                 |
| Allevyn..Vacs,Picos,lava therapy, honey, silver,aqua cell ag, aqua cell, flaminol, Seaweed dressing, iodine dressing, tegaderm dressing, aqua cell extra, kliniderm dressing, Prontosan wash, invading,for the past 6-7 yrs before starting Amicapsil in December 2021 |
| Various dressings and packing of deep wound. Cleansed with Prontosan which has been associated with excessive cytotoxicity                                                                                                                                             |
| Every type of wound care that the NHS district nurses offer.                                                                                                                                                                                                           |
